# Supplementary material
Source: PubMed Central journal article supplement (PMC8256306)
Supplement: EMBR-22-e51342-s001.pdf [file EMBR-22-e51342-s001.pdf]

# **Dynamic subcellular compartmentalization ensures the fidelity of piRNA biogenesis in silkworms**

Pui Yuen Chung, Keisuke Shoji, Natsuko Izumi, Yukihide Tomari

## **Appendix**

### **Table of contents:**

Appendix Figure S1

# Appendix View Figure 1

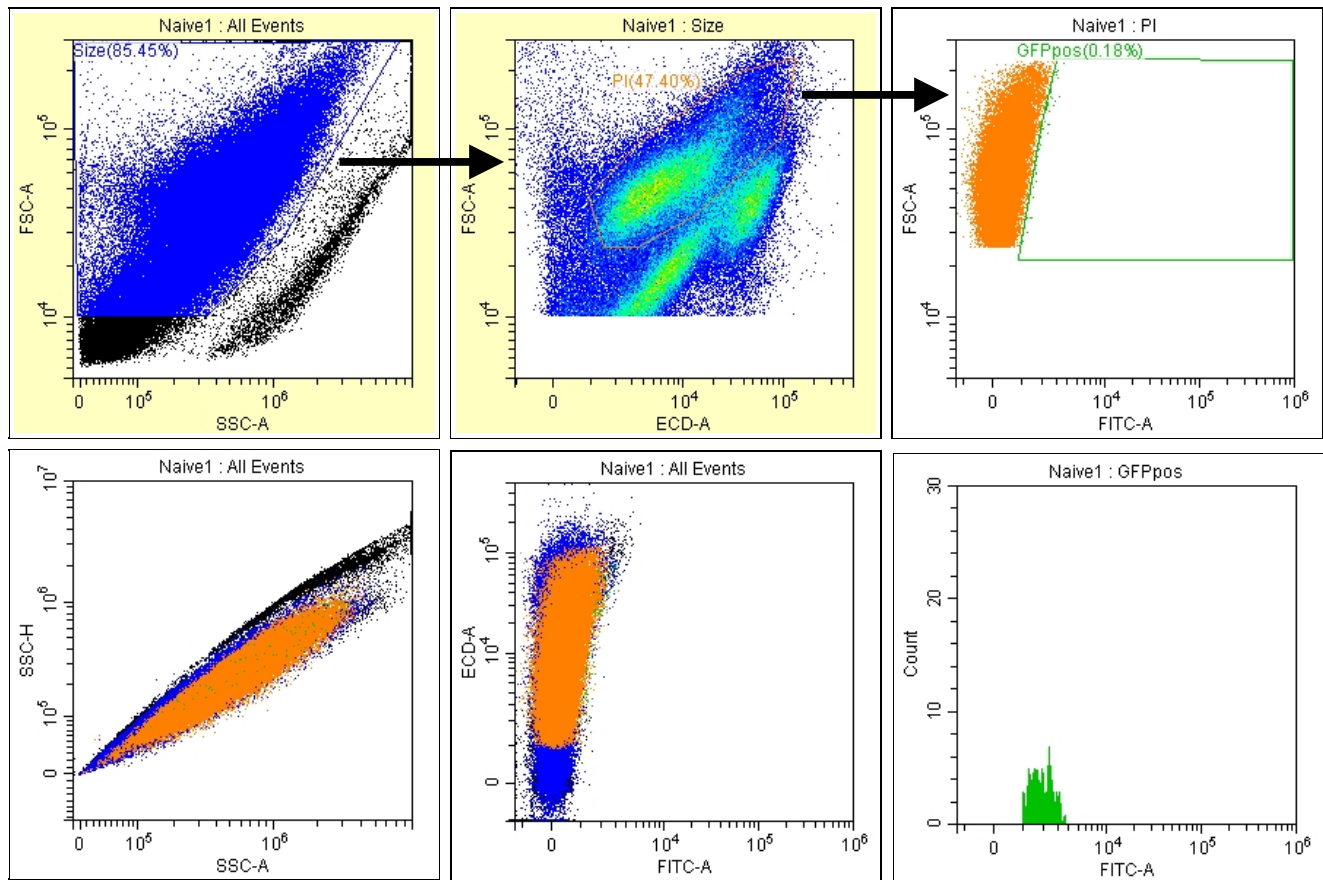

## Appendix Figure S1. Gating strategy for flow cytometry.

All particles were first gated through a forward (FSC) versus side (SSC) scatter gate "Size" (blue) that excludes debris and nanoparticles. Gated particles were then pass through a "PI" gate (orange) to remove dead cells using propidium iodide emission (collected with an ECD filter). An FITC fluorescence gate "GFPpos" (green) was then applied to identify GFP positive cells. All populations were back-gated to a SSC-H (height) versus SSC-A (area) scatter plot to check doublet discrimination, as well as an ECD-A versus FITC-A scatter plot to check autofluorescence. An FITC-A histogram is also plotted to evaluate variation in expression level. Black arrows denote gating hierarchy.
